# Supplementary material
Source: PubMed Central journal article supplement (PMC4860732)
Supplement: NIHMS782562-supplement-supplement_1.pdf [file NIHMS782562-supplement-supplement_1.pdf]

## Supplementary data

### *miR-223 knockdown and overexpression*

The miR-223 sponge vector has been previously described [25]. In brief, it consists of a third-generation LV containing a polymerase-II-based promoter (spleen focus-forming virus promoter/enhancer [SFFV]) optimized for high transgene expression in human stem and progenitor cells (HSPCs) and myeloid lineage cells, which drives the expression of a nontoxic marker gene (destabilized GFP) containing eight copies of an imperfectly complementary miR-223 binding site. Lentiviral overexpression of miR-223 was performed as previously described [24,25], consisting of a SFFV promoter, the miR-223 pri-miR inserted into the first intron of the *Eflα* gene, and an orange fluorescent protein marker gene (*mO2*).

### *Flow cytometric analysis and cell sorting*

The progeny of human CD34<sup>+</sup> cells were labeled with the following antibodies: anti-CD11b Pacific Blue or allophycocyanine (APC)-Alexa 780 (BD Pharmingen or eBiosciences), antihuman CD33 phycoerythrin (PE)-cyanine 7 (Cy7) or Brilliant Violet 421 (BD), antihuman CD34 PE, PE-Cy7 or APC (BD Pharmingen), antihuman CD133 APC (Miltenyi Biotec), antihuman CD38 APC or V450 (BD), antihuman CD90 APC or PE (BD), antihuman CD16 PE, PE-Cy5 or PE-Cy7 (BD or DAKO), antihuman CD13 APC or PE (BD), antihuman CD14 peridinin chlorophyll (PerCP; BD), antihuman CD19 PE-Cy7 (BD), antihuman CD3 APC or Pacific Blue (BD), antihuman CD235a PE or APC (DAKO or BD), and antihuman CD45 APC-H7 or Pacific Blue (BD). Cells were stained at a density of 10<sup>7</sup>/mL for 20 min at 4°C, washed, and analyzed on a LSRII Fortessa flow cytometer or FACS Canto II (Becton-Dickinson). Cell sorting was performed on a MoFlow sorter (Beckman Coulter).

### *Proliferation assay*

Sorted, GFP-expressing BM cells were plated in BM medium at a starting concentration of 20,000 cells/mL. Cell numbers were determined via counting in Trypan blue solution every 48 hours for 7 days.

### *Colony-forming cell assay*

For in vitro colony-forming cell (CFC) assays, sorted, GFP-expressing cells were plated in MethoCult media (StemCell

Technologies) at a concentration of 1,000 cells/mL. Colony numbers and cell counts were assessed weekly, followed by weekly serial replating over a period of 3 weeks maximum.

### *Real-time PCR*

RNA was extracted using Trizol. Reverse transcription of miR-223, with miR-92 as housekeeping gene [14] for human and sno-202 for murine samples, was performed using the Taqman miRNA Reverse Transcription Kit (Applied Biosystems, Foster City, CA) according to the manufacturer's instructions. Real-time PCR was performed using miR-223, as well as miR-92/RNU48 or sno-202 ABI Taqman probes on an Applied Biosystems 7900HT Fast Real-Time PCR system, in triplicate.

### *Quantification of miR-223 by hybridization arrays*

Samples of 115 de novo AML patients were obtained from bone marrow aspirates, blast cells were purified by Ficoll Hypaque (Nygaard, Oslo Norway), and total RNA was extracted with Trizol, as described previously [33]. All patients provided written, informed consent in accordance with the Declaration of Helsinki and were treated according to Hovon42 of the Dutch-Belgian-Hematology-Oncology-Cooperative group (available at <http://www.hovon.nl>). Samples were analyzed using Affymetrix miRNA 1.0 GeneChips (Affymetrix, Santa Clara, CA), according to the manufacturer's protocol. Briefly, 1 μg of RNA was biotin labeled using FlashTag Biotin RNA labeling kit (Genishpere, Hatfield, PA). Biotin-labeled samples were hybridized with GeneChip hybridization, wash, and stain kit and scanned with Affymetrix GeneChip Scanner. The obtained data (Supplementary Table E1) were normalized using the robust multi-array average (RMA) method.

### *Sorting of AML subpopulations*

Patient bone marrow samples were obtained after informed consent was provided and with the approval of the Clinical Research Ethics Board of the University of British Columbia. They showed the following characteristics: FAB M4 (normal karyotype), M1 (unknown karyotype), M5 (normal karyotype), M5b (normal karyotype), and M1 (normal karyotype). The cells were stained as previously described [32] and sorted into four populations (CD34<sup>-</sup>, CD34<sup>+</sup>CD38<sup>+</sup>, CD34<sup>+</sup>CD38<sup>-</sup>, and a total blast population), followed by RNA extraction with Trizol (Invitrogen, Carlsbad, CA) as previously described [20].

**Supplementary Table E1.** Expression levels (log 2) of miR-223 in the profiled AML patient samples

| Patient | hsa-miR-223 | ELN classification |
|---------|-------------|--------------------|
| A002    | 7.465553    | Adverse            |
| A003    | 7.682119    | Adverse            |
| A006    | 7.623925    | Adverse            |
| A009    | 5.520364    | Adverse            |
| A018    | 6.783545    | Adverse            |
| A019    | 6.663668    | Adverse            |
| A027    | 5.470807    | Adverse            |
| A028    | 5.993056    | Adverse            |
| A030    | 5.179881    | Adverse            |
| A032    | 3.745725    | Adverse            |
| A036    | 6.459761    | Adverse            |
| A041    | 5.712106    | Adverse            |
| A044    | 6.895362    | Adverse            |
| A045    | 6.897757    | Adverse            |
| A047    | 5.098162    | Adverse            |
| A061    | 7.485504    | Adverse            |
| A067    | 6.122093    | Adverse            |
| A068    | 6.609147    | Adverse            |
| A079    | 6.793427    | Adverse            |
| A084    | 5.423153    | Adverse            |
| A088    | 5.572708    | Adverse            |
| A089    | 6.832248    | Adverse            |
| A092    | 5.459269    | Adverse            |
| A093    | 5.121201    | Adverse            |
| A094    | 7.021109    | Adverse            |
| A096    | 5.425439    | Adverse            |
| A100    | 6.696466    | Adverse            |
| A106    | 6.34158     | Adverse            |
| A107    | 4.1736      | Adverse            |
| A108    | 7.019696    | Adverse            |
| A004    | 6.926732    | Favorable          |
| A011    | 7.318853    | Favorable          |
| A012    | 6.636045    | Favorable          |
| A014    | 6.763334    | Favorable          |
| A017    | 6.299748    | Favorable          |
| A023    | 7.160719    | Favorable          |
| A031    | 7.339418    | Favorable          |
| A033    | 5.795588    | Favorable          |
| A034    | 4.812762    | Favorable          |
| A035    | 6.862276    | Favorable          |
| A040    | 6.505709    | Favorable          |
| A042    | 6.570924    | Favorable          |
| A043    | 6.429499    | Favorable          |
| A046    | 6.852291    | Favorable          |
| A050    | 7.031396    | Favorable          |
| A053    | 6.826373    | Favorable          |
| A054    | 6.606032    | Favorable          |
| A056    | 6.184179    | Favorable          |
| A060    | 6.517457    | Favorable          |
| A062    | 7.576693    | Favorable          |
| A065    | 6.083967    | Favorable          |
| A069    | 7.428319    | Favorable          |
| A070    | 6.261838    | Favorable          |
| A071    | 7.599975    | Favorable          |
| A072    | 5.312304    | Favorable          |
| A074    | 5.744253    | Favorable          |
| A076    | 7.450024    | Favorable          |
| A080    | 6.780867    | Favorable          |
| A081    | 7.962897    | Favorable          |
| A082    | 6.365168    | Favorable          |

(continued)

**Supplementary Table E1.** (continued)

| Patient | hsa-miR-223 | ELN classification    |
|---------|-------------|-----------------------|
| A086    | 8.27315     | Favorable             |
| A097    | 5.697825    | Favorable             |
| A099    | 5.685469    | Favorable             |
| A102    | 7.237895    | Favorable             |
| A105    | 6.918886    | Favorable             |
| A113    | 6.50455     | Favorable             |
| A001    | 8.279448    | Intermediate I: NK    |
| A007    | 8.53535     | Intermediate I: NK    |
| A008    | 6.513398    | Intermediate I: NK    |
| A013    | 5.91849     | Intermediate I: NK    |
| A015    | 7.267184    | Intermediate I: NK    |
| A020    | 6.611535    | Intermediate I: NK    |
| A021    | 6.575376    | Intermediate I: NK    |
| A022    | 6.890913    | Intermediate I: NK    |
| A024    | 6.749806    | Intermediate I: NK    |
| A025    | 7.777081    | Intermediate I: NK    |
| A026    | 6.837991    | Intermediate I: NK    |
| A029    | 6.341842    | Intermediate I: NK    |
| A037    | 6.368287    | Intermediate I: NK    |
| A038    | 5.640762    | Intermediate I: NK    |
| A039    | 7.305367    | Intermediate I: NK    |
| A049    | 6.413876    | Intermediate I: NK    |
| A051    | 5.708693    | Intermediate I: NK    |
| A052    | 7.900176    | Intermediate I: NK    |
| A055    | 7.725691    | Intermediate I: NK    |
| A057    | 5.050639    | Intermediate I: NK    |
| A058    | 6.328099    | Intermediate I: NK    |
| A059    | 6.905414    | Intermediate I: NK    |
| A063    | 6.654579    | Intermediate I: NK    |
| A064    | 7.116859    | Intermediate I: NK    |
| A066    | 6.110807    | Intermediate I: NK    |
| A073    | 6.497773    | Intermediate I: NK    |
| A077    | 3.168967    | Intermediate I: NK    |
| A078    | 5.809293    | Intermediate I: NK    |
| A083    | 6.531438    | Intermediate I: NK    |
| A090    | 7.224567    | Intermediate I: NK    |
| A095    | 6.513924    | Intermediate I: NK    |
| A103    | 6.888729    | Intermediate I: NK    |
| A115    | 5.68294     | Intermediate I: NK    |
| A005    | 5.053096    | Intermediate II: rest |
| A010    | 6.983745    | Intermediate II: rest |
| A016    | 7.502192    | Intermediate II: rest |
| A048    | 7.079939    | Intermediate II: rest |
| A075    | 7.867951    | Intermediate II: rest |
| A085    | 7.226651    | Intermediate II: rest |
| A087    | 4.429051    | Intermediate II: rest |
| A091    | 4.902436    | Intermediate II: rest |
| A098    | 6.514174    | Intermediate II: rest |
| A101    | 5.465915    | Intermediate II: rest |
| A104    | 6.784386    | Intermediate II: rest |
| A109    | 7.153646    | Intermediate II: rest |
| A110    | 4.491841    | Intermediate II: rest |
| A111    | 6.919614    | Intermediate II: rest |
| A112    | 6.335259    | Intermediate II: rest |
| A114    | 6.446647    | Intermediate II: rest |

**Supplementary Table E2.** Cox regression analysis (uni-/multivariate) of miR-223 levels in 115 profiled AML patients.

|                                        |                       | Variable               | Haz. ratio | St. err. | z    | p >  z | 95% conf. interval |        |
|----------------------------------------|-----------------------|------------------------|------------|----------|------|--------|--------------------|--------|
| Cox regression analysis (Univariate)   |                       |                        |            |          |      |        |                    |        |
| OS                                     | Continuous            | miR-223                | 0.763      | 0.097    | 2.14 | 0.032  | 0.595              | 0.978  |
| EFS                                    | Continuous            | miR-223                | 0.793      | 0.089    | 2.07 | 0.039  | 0.637              | 0.988  |
| RFS                                    | Continuous            | miR-223                | 0.720      | 0.117    | 2.03 | 0.043  | 0.524              | 0.989  |
| OS                                     | Dichotomized (median) | miR-223                | 0.692      | 0.185    | 1.38 | 0.168  | 0.411              | 1.167  |
| EFS                                    | Dichotomized (median) | miR-223                | 0.700      | 0.167    | -1.5 | 0.134  | 0.438              | 1.117  |
| RFS                                    | Dichotomized (median) | miR-223                | 0.704      | 0.255    | 0.97 | 0.332  | 0.346              | 1.413  |
| OS                                     | Quartiles             | miR-223                | 0.778      | 0.097    | 2.01 | 0.044  | 0.610              | 0.993  |
| EFS                                    | Quartiles             | miR-223                | 0.802      | 0.087    | 2.02 | 0.043  | 0.648              | 0.993  |
| RFS                                    | Quartiles             | miR-223                | 0.772      | 0.129    | 1.54 | 0.123  | 0.556              | 1.072  |
| Cox regression analysis (Multivariate) |                       |                        |            |          |      |        |                    |        |
| OS                                     | Continuous            | mir-223                | 0.817      | 0.101    | 1.63 | 0.102  | 0.641              | 1.004  |
|                                        |                       | Age                    | 0.997      | 0.014    | 0.19 | 0.851  | 0.970              | 1.025  |
|                                        |                       | Log(WBC)               | 1.350      | 0.154    | 2.64 | 0.008  | 1.080              | 1.688  |
|                                        |                       | ELN (Favorable (ref))  |            |          |      |        |                    |        |
|                                        |                       | Intermediate II (rest) | 3.706      | 1.777    | 2.73 | 0.006  | 1.447              | 9.487  |
|                                        |                       | Intermediate I (NK)    | 4.310      | 1.799    | 3.5  | 0.000  | 1.901              | 9.768  |
|                                        |                       | Adverse                | 4.512      | 1.968    | 3.45 | 0.001  | 1.919              | 10.609 |
| EFS                                    | Continuous            | mir-223                | 0.833      | 0.094    | 1.63 | 0.104  | 0.668              | 1.038  |
|                                        |                       | Age                    | 0.992      | 0.012    | 0.68 | 0.499  | 0.968              | 1.016  |
|                                        |                       | Log(WBC)               | 1.110      | 0.111    | 1.04 | 0.297  | 0.913              | 1.350  |
|                                        |                       | ELN (Favorable (ref))  |            |          |      |        |                    |        |
|                                        |                       | Intermediate II (rest) | 2.016      | 0.818    | 1.73 | 0.084  | 0.910              | 4.467  |
|                                        |                       | Intermediate I (NK)    | 2.882      | 0.967    | 3.15 | 0.002  | 1.493              | 5.563  |
|                                        |                       | Adverse                | 2.660      | 0.941    | 2.76 | 0.006  | 1.329              | 5.323  |
| RFS                                    | Continuous            | mir-223                | 0.710      | 0.118    | 2.06 | 0.039  | 0.512              | 0.983  |
|                                        |                       | Age                    | 0.983      | 0.020    | 0.84 | 0.401  | 0.944              | 1.023  |
|                                        |                       | Log(WBC)               | 1.605      | 0.253    | 3    | 0.003  | 1.178              | 2.186  |
|                                        |                       | ELN (Favorable (ref))  |            |          |      |        |                    |        |
|                                        |                       | Intermediate II (rest) | 2.629      | 1.486    | 1.71 | 0.087  | 0.868              | 7.958  |
|                                        |                       | Intermediate I (NK)    | 3.460      | 1.638    | 2.62 | 0.009  | 1.369              | 8.749  |
|                                        |                       | Adverse                | 1.504      | 0.907    | 0.68 | 0.499  | 0.461              | 4.907  |
| OS                                     | Quartile              | mir-223                | 0.798      | 0.102    | 1.77 | 0.077  | 0.621              | 1.024  |
|                                        |                       | Age                    | 0.995      | 0.014    | 0.33 | 0.743  | 0.968              | 1.024  |
|                                        |                       | Log(WBC)               | 1.348      | 0.152    | 2.64 | 0.008  | 1.080              | 1.682  |
|                                        |                       | ELN (Favorable (ref))  |            |          |      |        |                    |        |
|                                        |                       | Intermediate II (rest) | 3.800      | 1.820    | 2.79 | 0.005  | 1.487              | 9.715  |
|                                        |                       | Intermediate I (NK)    | 4.320      | 1.803    | 3.51 | 0.000  | 1.906              | 9.790  |
|                                        |                       | Adverse                | 4.675      | 2.022    | 3.57 | 0.000  | 2.003              | 10.912 |
| EFS                                    | Quartile              | mir-223                | 0.811      | 0.092    | 1.85 | 0.065  | 0.649              | 1.013  |
|                                        |                       | Age                    | 0.990      | 0.012    | 0.81 | 0.417  | 0.966              | 1.015  |
|                                        |                       | Log(WBC)               | 1.109      | 0.110    | 1.05 | 0.294  | 0.914              | 1.346  |
|                                        |                       | ELN (Favorable (ref))  |            |          |      |        |                    |        |
|                                        |                       | Intermediate II (rest) | 2.076      | 0.840    | 1.81 | 0.071  | 0.940              | 4.586  |
|                                        |                       | Intermediate I (NK)    | 2.898      | 0.973    | 3.17 | 0.002  | 1.501              | 5.595  |
|                                        |                       | Adverse                | 2.738      | 0.956    | 2.89 | 0.004  | 1.381              | 5.427  |
| RFS                                    | Quartile              | mir-223                | 0.749      | 0.129    | 1.68 | 0.093  | 0.534              | 1.050  |
|                                        |                       | Age                    | 0.982      | 0.021    | 0.87 | 0.382  | 0.942              | 1.023  |
|                                        |                       | Log(WBC)               | 1.591      | 0.246    | 3.01 | 0.003  | 1.175              | 2.153  |
|                                        |                       | ELN (Favorable (ref))  |            |          |      |        |                    |        |
|                                        |                       | Intermediate II (rest) | 2.921      | 1.635    | 1.92 | 0.055  | 0.975              | 8.750  |
|                                        |                       | Intermediate I (NK)    | 3.494      | 1.650    | 2.65 | 0.008  | 1.385              | 8.814  |
|                                        |                       | Adverse                | 1.760      | 1.040    | 0.96 | 0.339  | 0.553              | 5.601  |

EFS = event-free survival; OS = overall survival; RFS = relapse free survival.

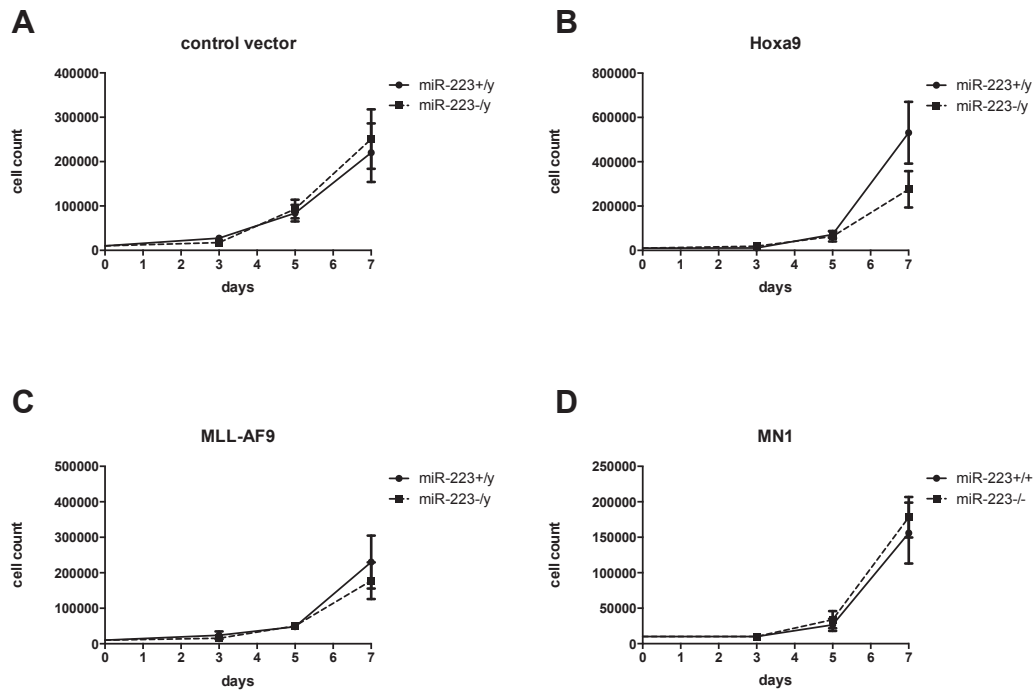

**Supplementary Figure E1.** The absence of miR-223 (miR-223-/y) did not significantly change the proliferation rate of BM cells retrovirally overexpressing (A) control vector, (B) Hoxa9, or (C) MLL-AF9, or (D) MN1.

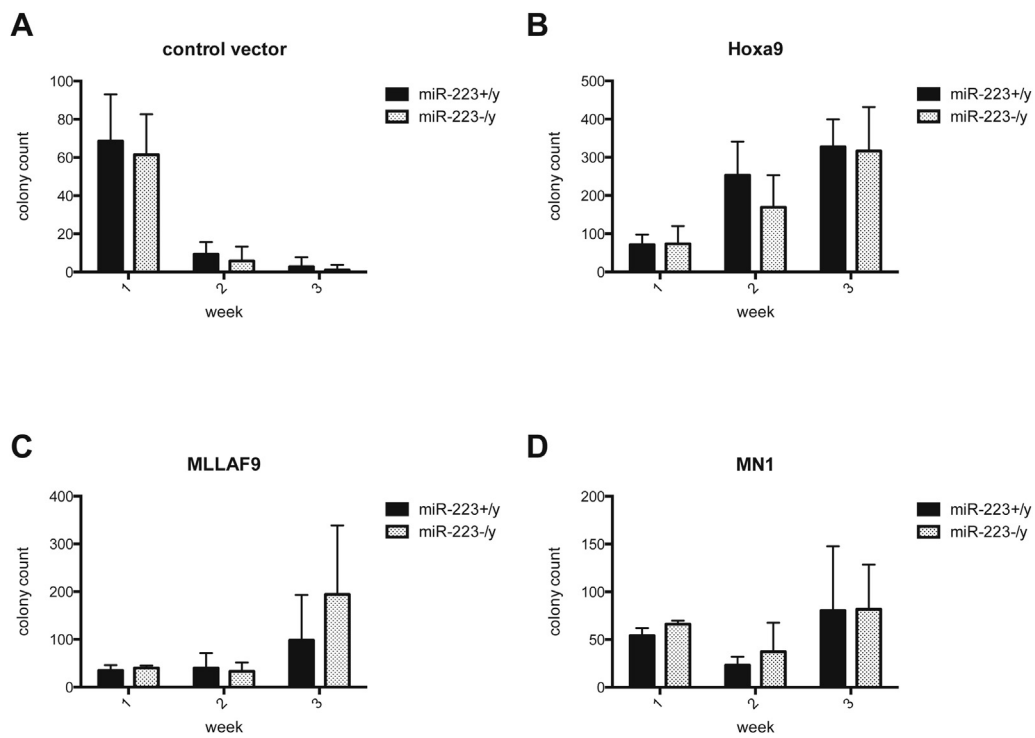

**Supplementary Figure E2.** Genetic depletion of miR-223 (miR-223-/y) did not significantly change the proliferation colony-forming capacity of BM cells retrovirally overexpressing (A) control vector, (B) Hoxa9, or (C) MLL-AF9, or (D) MN1.

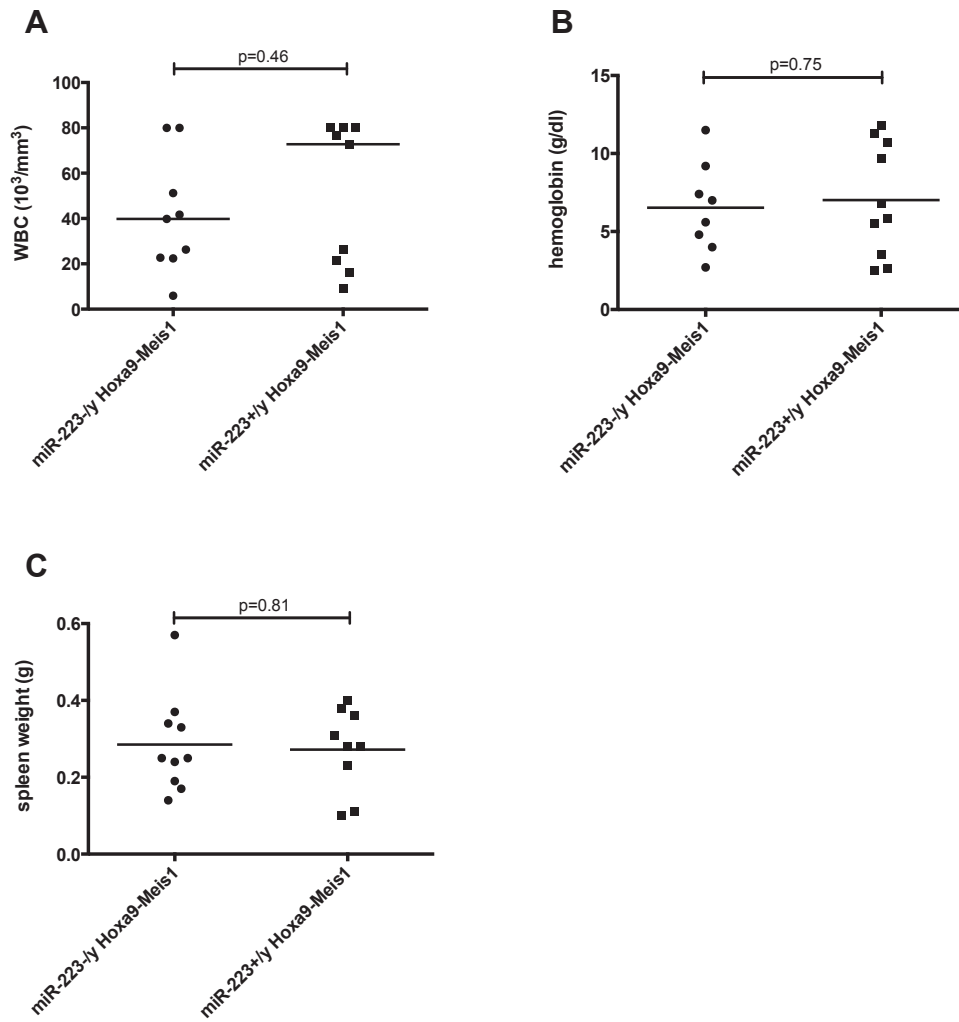

**Supplementary Figure E3.** No significant differences were seen in *Hoxa9-Meis1* leukemias with respect to overall disease characteristics such as (A) WBC count, (B) RBC count, and (C) spleen weight.

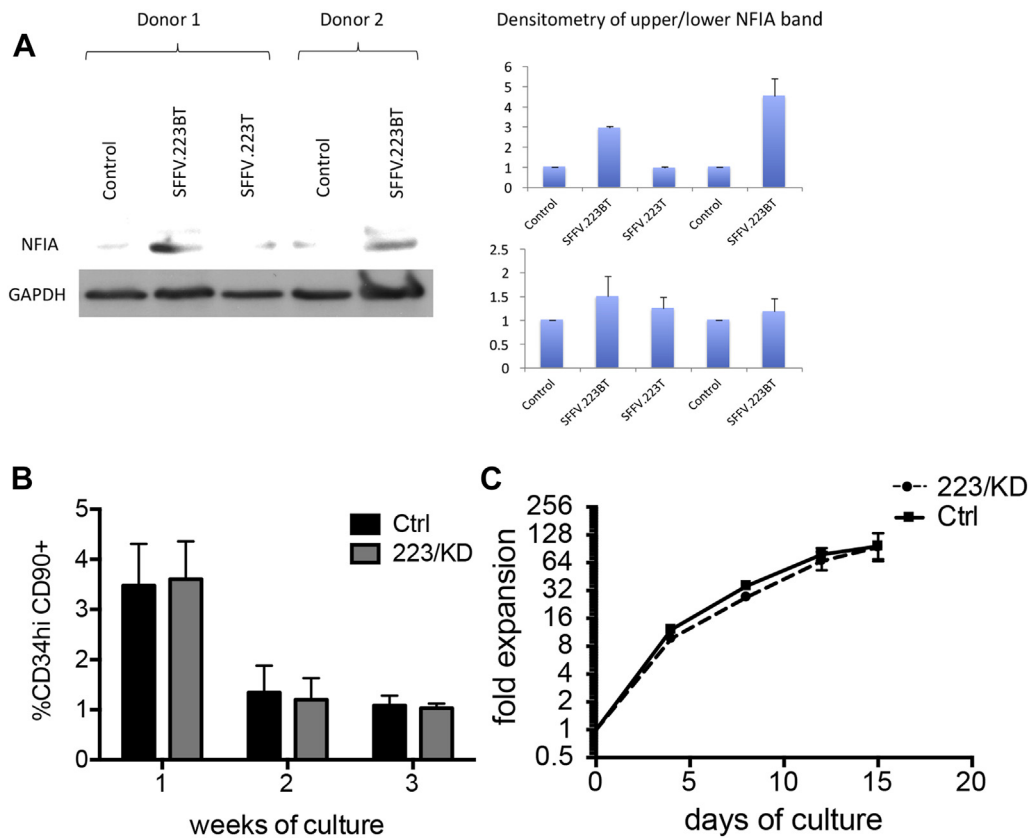

**Supplementary Figure E4.** (A) Left: Representative Western blot analysis for NFI-A (upper film) and GAPDH (lower film) performed on human CB cells transduced with a control LV (Control.SFFV), the optimized miR-223 sponge vector (SFFV.223BT;  $n = 2$  donors), and a first-generation miR-223 sponge vector (SFFV.223.T;  $n = 1$  donor). Right: densitometric analysis of the upper and lower NFI-A bands after normalization to GAPDH ( $n = 2$  technical replicates per sample; shown is the mean + range). The control LV-transduced sample was set to 1. (B) CD34<sup>+</sup> huCB cells ( $n = 6$  donors) were lentivirally transduced with a miR-223 sponge (223/KD) or control vector and cultured under maintenance conditions (Stem Span serum-free expansion medium + SCF, TPO, FLT3L, IL-6). Shown is the proportion of CD34<sup>hi</sup> cells over time (mean  $\pm$  SEM). Statistical analysis was performed by paired  $t$  test after log-odds conversion. (C) CD34<sup>+</sup> huCB cells ( $n = 2$  donors) were sorted into a CD133<sup>+</sup>CD38<sup>-</sup>/low cell population containing more primitive progenitors, transduced with 223/KD or control LV, and cultured under maintenance conditions. No significant differences in proliferation could be observed, by contrast with CD133<sup>+</sup>CD38<sup>+</sup> cells (see Fig. 2D).

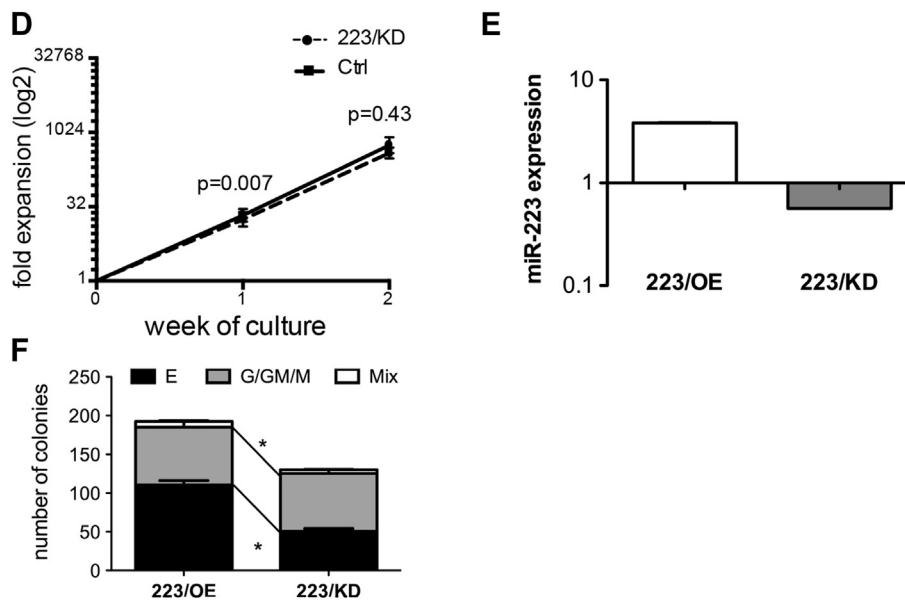

**Supplementary Figure E4.** (continued) (D) 223/KD- or control-LV-transduced CD34<sup>+</sup> CB cells ( $n = 8$  donors) were cultured in myeloid differentiation medium (IMDM + 10% FCS + SCF + G-CSF), and proliferation was assessed. Expansion of 223/KD-LV-treated cells relative to control-LV-transduced cells is shown. We noted a significantly reduced proliferation of 223/KD cells under myeloid culture conditions in the first week. (E) huCB CD34<sup>+</sup> cells were transduced with a control, the miR-223 KD, or OE LVs and plated in methylcellulose at a concentration of 800 cells/mL. Total colonies were harvested after 14 days, and miR-223 expression was measured by qPCR. CT values were normalized to RNU48 ( $\Delta$  CT) and expressed relative to the expression level found in control-LV-transduced cells. qPCR reactions were performed in triplicates, and the mean was used for calculating relative expression levels. (F) huCB CD34<sup>+</sup> cells were transduced with the miR-223 KD or OE LV and plated in methylcellulose at a concentration of 800 cells/mL. Colonies were counted after 14 days and distinguished morphologically into erythroid (CFU/BFU-E), myeloid (CFU-G/GM/M), or mixed (CFU-GEMM). The assay was done in quadruplicate; shown is the mean  $\pm$  SEM. Statistical analysis was performed by paired  $t$  test after log-odds conversion. \* $p < 0.05$ . Ctrl = Control; E = erythroid; GAPDH = glyceraldehyde 3-phosphate dehydrogenase; G/GM/M = myeloid; Mix = mixed.
